# Supplementary material for: The Role of Glucose Transporters in Oral Squamous Cell Carcinoma
Source: MDPI journal article supplement (doi:10.3390/biom11081070), 2021-07-21
Supplement: s1 [file s1]

## **Supplementary Materials 1 – Search Terms**

oral OR mouth OR lip OR palate OR buccal mucosa OR cheek OR retromolar OR floor of mouth OR gingiva OR tongue OR squamous cell

**AND**

cancer\* OR neoplas\* OR tumour\* OR tumor\* OR malignan\* OR carcinoma\* OR metastas\* OR normal

**AND**

glucose transport proteins, facilitative OR glucose transport\* OR slc2a OR solute carrier family 2 OR sodium-glucose transport protein\* OR sodium glucose transporter\* OR sodium-glucose transporter\* OR sglt\* OR slc5a OR sodium-dependent glucose cotransporter\* OR solute carrier family 5 OR glut

**AND**

initiation OR tumorigenesis OR tumourigenesis OR carcinogenesis OR progression OR metastasis OR prognos\* OR express\* OR inhibit\* OR treat\* OR drug therapy.
