# Supplementary material for: The Role of Glucose Transporters in Oral Squamous Cell Carcinoma
Source: MDPI journal article supplement (doi:10.3390/biom11081070), 2021-07-21
Supplement: s1 [file s1]

**Table S2.** Summary of findings for less studied GLUT family members.

| Gene                         | Author                              | Tissue type                   | Modality | Findings                                                                                                                                                                                 |
|------------------------------|-------------------------------------|-------------------------------|----------|------------------------------------------------------------------------------------------------------------------------------------------------------------------------------------------|
| GLUT2<br>( <i>SLC2A2</i> )   | Mellanen et al (1994) <sup>48</sup> | Tumour samples                | mRNA     | <i>SLC2A2</i> undetectable in 5/5 tumour samples                                                                                                                                         |
|                              | Fukuzumi et al (2000) <sup>38</sup> | Cell lines                    | mRNA     | <i>SLC2A2</i> expression in 5/9 OSCC cell lines and 2 normal epithelial lines                                                                                                            |
|                              | Reisser et al (1999) <sup>60</sup>  | Tumour samples                | Protein  | No GLUT2 expression in 1/1 tumour                                                                                                                                                        |
| GLUT8<br>( <i>SLC2A8</i> )   | Deron et al (2011) <sup>59</sup>    | Tumour samples                | Protein  | 35/35 tumours positive for GLUT8, mean H score 4.5 (SD: 3.7)                                                                                                                             |
| GLUT13<br>( <i>SLC2A13</i> ) | Lee et al (2011) <sup>91</sup>      | patient derived cell cultures | mRNA     | <i>SLC2A13</i> detected in 7/7 tumours with positive cells clustered together in islands within the tumour<br><i>SLC2A13</i> increased in sphere forming cells over primary tumour cells |
|                              |                                     |                               | protein  | GLUT13 expression primarily on cell membrane                                                                                                                                             |
| SGLT<br>( <i>SLC5A</i> )     | Helmke et al (2004) <sup>92</sup>   | cell lines                    | mRNA     | <i>SLC5A1</i> detected in 5/8 OSCC cell lines,<br><i>SLC5A2</i> not detected                                                                                                             |
|                              | Hanabata et al (2012) <sup>39</sup> | cell lines                    | protein  | SGLT-1 detected in 6/6 OSCC cell lines                                                                                                                                                   |
