# Supplementary material for: The Role of Glucose Transporters in Oral Squamous Cell Carcinoma
Source: MDPI journal article supplement (doi:10.3390/biom11081070), 2021-07-21
Supplement: s1 [file s1]

## Supplementary Materials 2 – QUIPS: studies evaluated

| First Author Surname | Year | Study Participation | Study Attrition | Prognostic Factor Measurement | Outcome Measurement | Study Confounding | Statistical Analysis and Reporting |
|----------------------|------|---------------------|-----------------|-------------------------------|---------------------|-------------------|------------------------------------|
| Yu                   | 2015 | LOW                 | LOW             | LOW                           | LOW                 | MODERATE          | LOW                                |
| Kondo                | 2011 | LOW                 | LOW             | LOW                           | LOW                 | MODERATE          | LOW                                |
| Eckert               | 2011 | LOW                 | HIGH            | LOW                           | LOW                 | MODERATE          | LOW                                |
| Eckert               | 2008 | LOW                 | LOW             | LOW                           | LOW                 | MODERATE          | LOW                                |
| Nakazato             | 2019 | LOW                 | LOW             | LOW                           | LOW                 | LOW               | LOW                                |
| Choi                 | 2007 | LOW                 | LOW             | LOW                           | LOW                 | LOW               | LOW                                |
| Grimm                | 2014 | LOW                 | LOW             | LOW                           | LOW                 | LOW               | LOW                                |
| Ayala                | 2010 | LOW                 | HIGH            | LOW                           | LOW                 | LOW               | LOW                                |
| Xu                   | 2018 | MODERATE            | LOW             | LOW                           | LOW                 | HIGH              | LOW                                |
| Estilo               | 2009 | LOW                 | LOW             | LOW                           | LOW                 | LOW               | LOW                                |
| Kunkel               | 2003 | LOW                 | LOW             | LOW                           | LOW                 | MODERATE          | LOW                                |
| Ohba                 | 2009 | MODERATE            | LOW             | LOW                           | LOW                 | HIGH              | LOW                                |
| Kunkel               | 2007 | MODERATE            | LOW             | LOW                           | LOW                 | LOW               | LOW                                |
| Oliver               | 2004 | HIGH                | LOW             | MODERATE                      | LOW                 | MODERATE          | LOW                                |
| Han                  | 2011 | LOW                 | LOW             | LOW                           | LOW                 | MODERATE          | LOW                                |
