# Supplementary material for: The Role of Glucose Transporters in Oral Squamous Cell Carcinoma
Source: MDPI journal article supplement (doi:10.3390/biom11081070), 2021-07-21
Supplement: s1 [file s1]

**Table S1.** GLUT1 protein expression in patient tumours (IHC).

| Author                  | Number of Patients | Number positive (%) | IHC cut-off                                    | Percentage of cells stained positive                                   | Staining Intensity                     | Other findings                                                                                                                                                                                    |
|-------------------------|--------------------|---------------------|------------------------------------------------|------------------------------------------------------------------------|----------------------------------------|---------------------------------------------------------------------------------------------------------------------------------------------------------------------------------------------------|
| Ayala et al (2010)      | 142                | 135 (95.07%)        | >10% of cells stained moderately               | <85% in 58 tumours.<br>>85% in 77 tumours.                             | NR                                     | None                                                                                                                                                                                              |
| Zhang et al (2013)      | 45                 | 45 (100%)           | >5%                                            | “Strong expression” in 28 tumours.<br>“weak expression” in 17 tumours. | NR                                     | None                                                                                                                                                                                              |
| Panda et al (2019)      | 76                 | 76 (100%)           | Any visible staining.                          | NR                                                                     | Intense: 27<br>Mild: 49                | None                                                                                                                                                                                              |
| Yu et al (2015)         | 49                 | 49 (100%)           | NR                                             | NR                                                                     | NR                                     | None                                                                                                                                                                                              |
| Kondo et al (2011)      | 104                | 96 (92.31%)         | >10%                                           | 37%                                                                    | NR                                     | The mean positive rate for GLUT-1 in all tumour cells was 34%.<br>No GLUT1 detected in normal samples                                                                                             |
| Eckert et al (2011)     | 79                 | 47 (59.49%)         | >10%                                           | NR                                                                     | Weak: 13<br>Moderate: 21<br>Strong: 11 | GLUT-1 was expressed weakly in 13, moderately expressed in 22, and strongly expressed in 12.                                                                                                      |
| Frohwitter et al (2016) | 193                | 177 (91.71%)        | ≥ 1%                                           | NR                                                                     | NR                                     | None                                                                                                                                                                                              |
| Togo et al              | 59                 | 59 (100%)           | Any membranous staining.                       | NR                                                                     | NR                                     | None                                                                                                                                                                                              |
| Deron et al (2011)      | 35                 | 35 (100%)           | >0%                                            | NR                                                                     | NR                                     | None                                                                                                                                                                                              |
| Reisser et al (1999)    | 1                  | 1 (100%)            | NR                                             | NR                                                                     | NR                                     | None                                                                                                                                                                                              |
| Demeda et al (2014)     | 40                 | 40 (100%)           | NR                                             | NR                                                                     | NR                                     | None                                                                                                                                                                                              |
| Tian et al (2004)       | 19                 | 18 (94.74%)         | ≥ 1%                                           | Mean: 79.74%                                                           | Weak: 4<br>Moderate: 3<br>Strong: 11   | Stained weakly in 4 tumours, moderately in 3, strongly in 11.                                                                                                                                     |
| Azad et al (2016)       | 50                 | 50 (100%)           | NR                                             | Mean: 65.6%                                                            | NR                                     | Cell positivity varied between 15% to 95% between tumours (mean 65.60±25.67%).                                                                                                                    |
| Eckert et al (2008)     | 42                 | 17 (40.48%)         | NR                                             | NR                                                                     | Weak: 7<br>Moderate: 8<br>Strong: 2    | Moderate to strong GLUT-1 staining: 10 patients<br>Negative to weak GLUT-1 staining: 32 patients                                                                                                  |
| Yokobori et al (2015)   | 27                 | 27 (100%)           | >0%                                            | <10%: 2<br>11–25%: 8<br>26–50%: 14<br>>50%: 3                          | NR                                     | IHC scoring: 2 patients with score 1, 8 with score 2, 14 with score 3, and 3 with score 4.                                                                                                        |
| Qamar et al (2019)      | 60                 | 52 (86.67%)         | >10%                                           | NR                                                                     | Weak :20<br>Strong: 32                 | Staining was weak in 20 (38.46%) strong in 32 (61.5%) cases                                                                                                                                       |
| Choi et al (2007)       | 60                 | NR                  | IHC score of 3.                                | Median 60.0% (range: 0.0~90.0%).                                       | NR                                     | None                                                                                                                                                                                              |
| Harshani et al (2014)   | 30                 | 29 (96.67%)         | >10                                            | NR                                                                     | Weak: 10 Moderate: 14 Strong: 5        | • Normal tissue IHC staining score: 0 for 18 cases, 1 for 5 cases, 2 for 4 cases, 3 for 3 cases.<br>• OSCC tissue IHC staining score: 0 for 1 case, 1 for 10 cases, 2 for 14 cases, 3 for 5 cases |
| Angadi et al (2015)     | 30                 | 30 (100%)           | ≥1%                                            | 25-50%: 16<br>>50%: 14                                                 | Mild: 10<br>Intense: 20                | Expression was significantly greater in OSCC compared to healthy tissues.                                                                                                                         |
| Grimm et al (2014)      | 161                | 67 (42%)            | ≥10%                                           | NR                                                                     | NR                                     | No GLUT-1 detected in normal samples                                                                                                                                                              |
| Wang et al (2017)       | 20                 | NR                  | Any brown staining of cells.                   | NR                                                                     | NR                                     | GLUT-1 in OSCC was significantly greater compared to normal samples, and was rarely detected in the latter.                                                                                       |
| Grönroos et al (2014)   | 5                  | 4 (80%)             | Presence of “slight netlike membrane staining” | Mean: 19% (0-60)                                                       | NR                                     | None                                                                                                                                                                                              |
| Pereira et al (2016)    | 15                 | 15 (100%)           | NR                                             | 74.02% (54.2-86.2)                                                     | NR                                     | None                                                                                                                                                                                              |
| Ohba et al (2010)       | 24                 | 24 (100%)           | >0%                                            | NR                                                                     | Weak: 13<br>Intense: 11                | None                                                                                                                                                                                              |
| Oliver et al (2004)     | 54                 | 49/54 (90.74%)      | >0%                                            | NR                                                                     | Weak: 20<br>Moderate: 16               | None                                                                                                                                                                                              |

|                       |     |             |     |                                                |                                      |                                      |
|-----------------------|-----|-------------|-----|------------------------------------------------|--------------------------------------|--------------------------------------|
| Intense: 13           |     |             |     |                                                |                                      |                                      |
| Brands et al (2017)   | 15  | 12 (80%)    | NR  | NR                                             | NR                                   | No GLUT-1 detected in normal samples |
| Roh et al (2009)      | 42  | 30 (71.43)  | ≥1% | 1-10%: 2<br>11-50%: 6<br>51-80%: 14<br>>80%: 9 | NR                                   | None                                 |
| Jensen et al (2015)   | 30  | 30 (100%)   | NR  | NR                                             | Weak: 6<br>Moderate: 23<br>Strong: 1 | None                                 |
| Han et al (2012)      | 33  | 23 (70%)    | ≥1% | 1-10%: 0<br>11-50%: 7<br>51-80%: 10<br>>80%: 6 | NR                                   | None                                 |
| Miyawaki et al (2010) | 37  | 30 (81%)    | <0% | NR                                             | NR                                   | None                                 |
| Xiao et al (2013)     | 14  | 12 (85.71%) | <0% | 22.04% (0-100%)                                | NR                                   | None                                 |
| Kunkel et al (2003)   | 118 | 118 (100%)  | <0% | NR                                             | NR                                   | None                                 |
