# Supplementary material for: The Role of Glucose Transporters in Oral Squamous Cell Carcinoma
Source: Biomolecules. 2021 Jul 21;11(8):1070. doi: 10.3390/biom11081070 (PMC8392467; doi:10.3390/biom11081070)
Supplement: Supplementary file 1 [file biomolecules-11-01070-s001.zip]

Archive with 4 entries (4 files):
- Supplementary Materials 1_Search Terms.pdf
- Supplementary Materials 2_QUIPS studies.pdf
- Table S1 - GLUT1 protein expression in patient tumours (IHC).pdf
- Table S2 - Summary of findings for less studied GLUT family members.pdf
